# Supplementary material for: SNARE Protein DdVam7 of the Nematode-Trapping Fungus Drechslerella dactyloides Regulates Vegetative Growth, Conidiation, and the Predatory Process via Vacuole Assembly
Source: PubMed Central journal article supplement (PMC9769606; doi:10.1128/spectrum.01872-22), 2022-10-26
Supplement: spectrum.01872-22-s0006.pdf [file spectrum.01872-22-s0006.pdf]

## Supplementary Information

**Fig. S1**

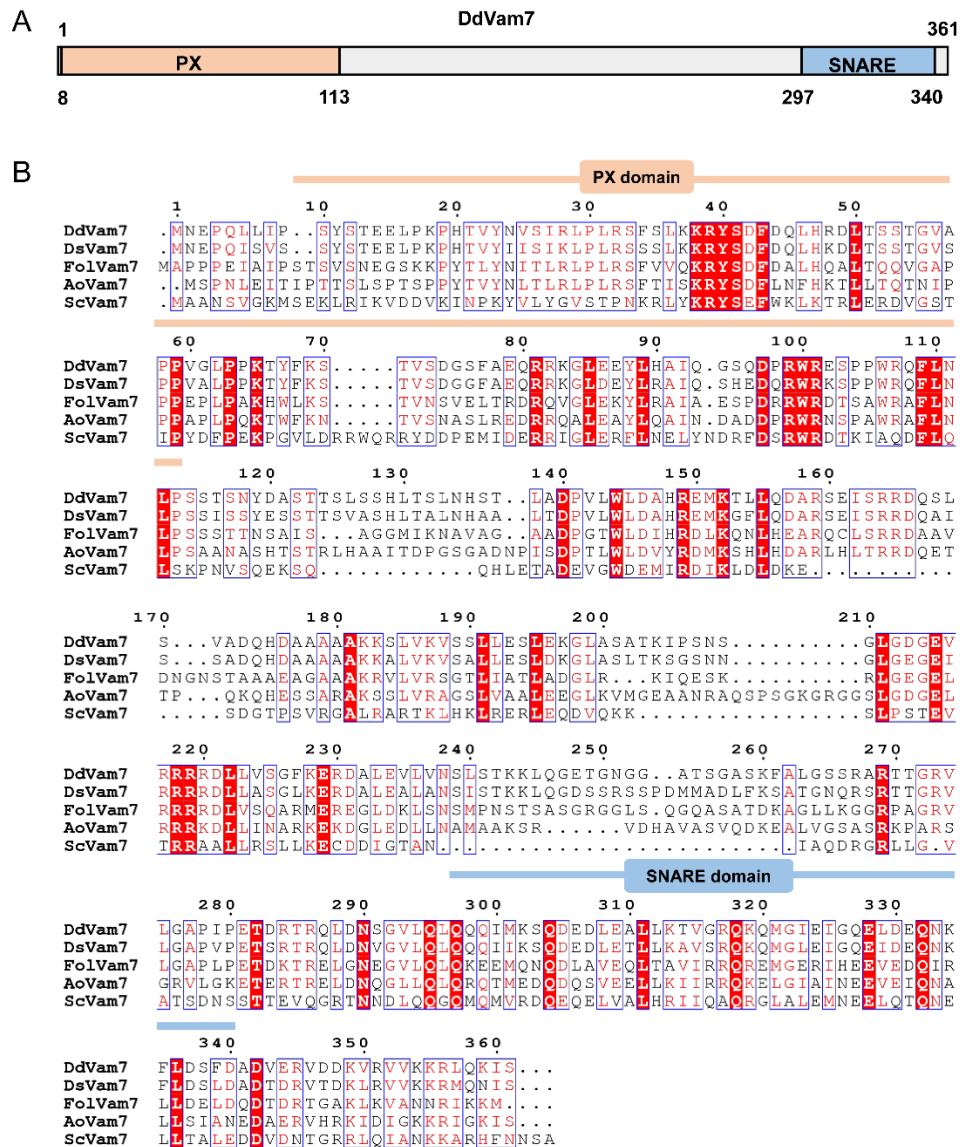

**Fig. S1** Sequence alignment of *D. dactyloides* DdVam7 with its homologues encoded by other species. (A) A schematic diagram of DdVam7 and its PX and SNARE domains. The PHOX homology motif (PX) (8–113 residues) at the N-terminus and a SNARE domain (297–340 residues) at the C-terminus are noted. (B) Sequences of DdVam7, DsVam7 (*Drechlerella stenobrocha*, EWC44037.1), FoIVam7 (*Fusarium oxysporum* f. sp. *lycopersici*, XP\_018235815.1), AoVam7 (*Aspergillus oryzae*, BAF36378.1), and ScVam7 (*Saccharomyces cerevisiae*, NP\_011303.1) were aligned using ClustalW. Conserved amino acids are in blue boxes. Similar amino acids are indicated by red text, and identical amino acids are noted using a red background.

**Fig. S2**

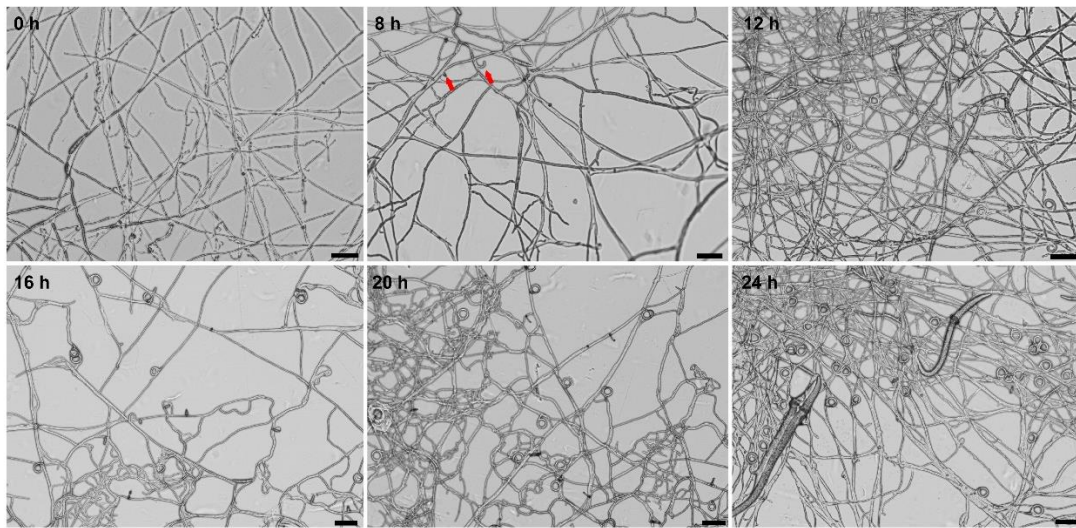

**Fig. S2** CR formation after introducing *C. elegans* on *D. dactyloides* mycelia growing on WA plates covered with cellophane membrane. Images were collected at 0, 8, 12, 16, 20 and 24 hours after introducing *C. elegans*. Red arrows indicate incompletely formed CRs. Scale bar = 50  $\mu$ m.

**Fig. S3**

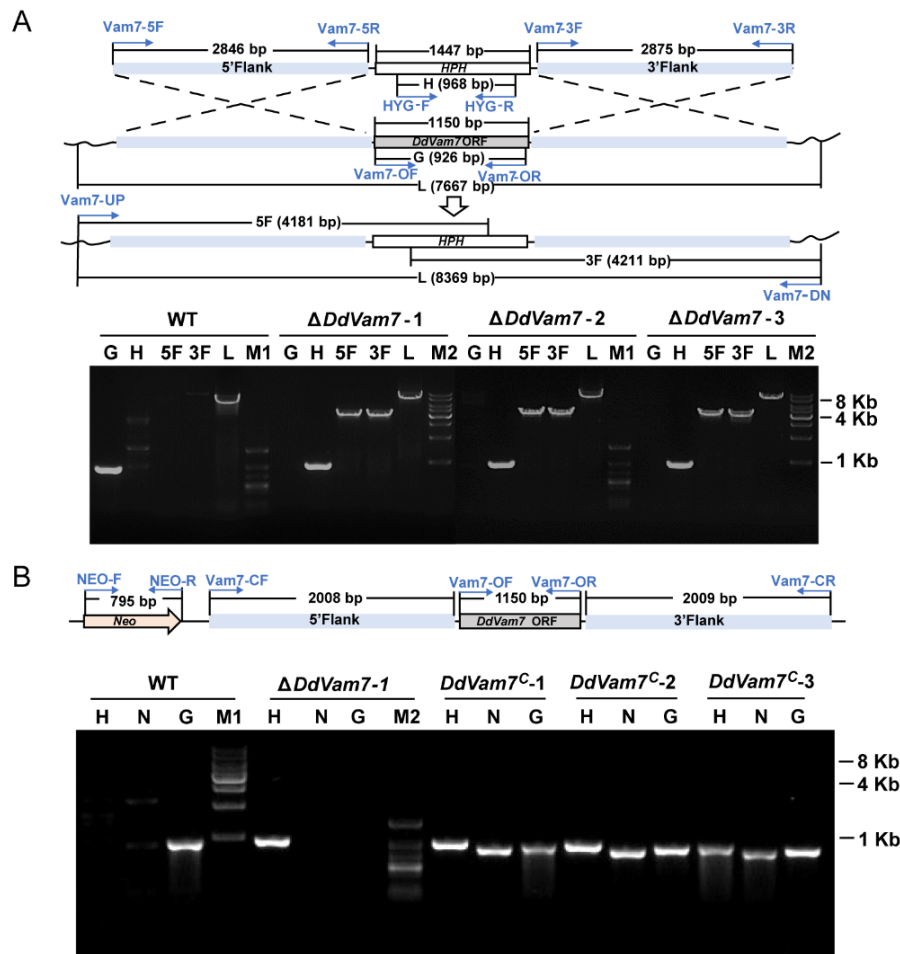

**Fig. S3** Disruption and complementation of *DdVam7*. (A) Disruption of *DdVam7* via homologous recombination (upper panel) and verification of gene disruption using PCR (lower panel). (B) Complementation of  $\Delta DdVam7$  (upper panel) and verification of complementation using PCR (lower panel). M1: DNA marker D2000; M2: DNA marker 1 Kb; H: partial hygromycin resistance gene amplified using primers HYG-F and HYG-R; N: partial geneticin resistance gene amplified using primers NEO-F and NEO-R; G: partial *DdVam7* ORF amplified using primers Vam7-OF and Vam7-OR; 5F: Correct recombination ensured by PCR using primers Vam7-UP and HYG-R; 3F: Correct recombination ensured by PCR using primers Vam7-DN and HYG-F; L: PCR results amplified using primers Vam7-UP and Vam7-DN. The regions amplified via PCR and the locations of individual primers were marked in upper panel.

**Fig. S4**

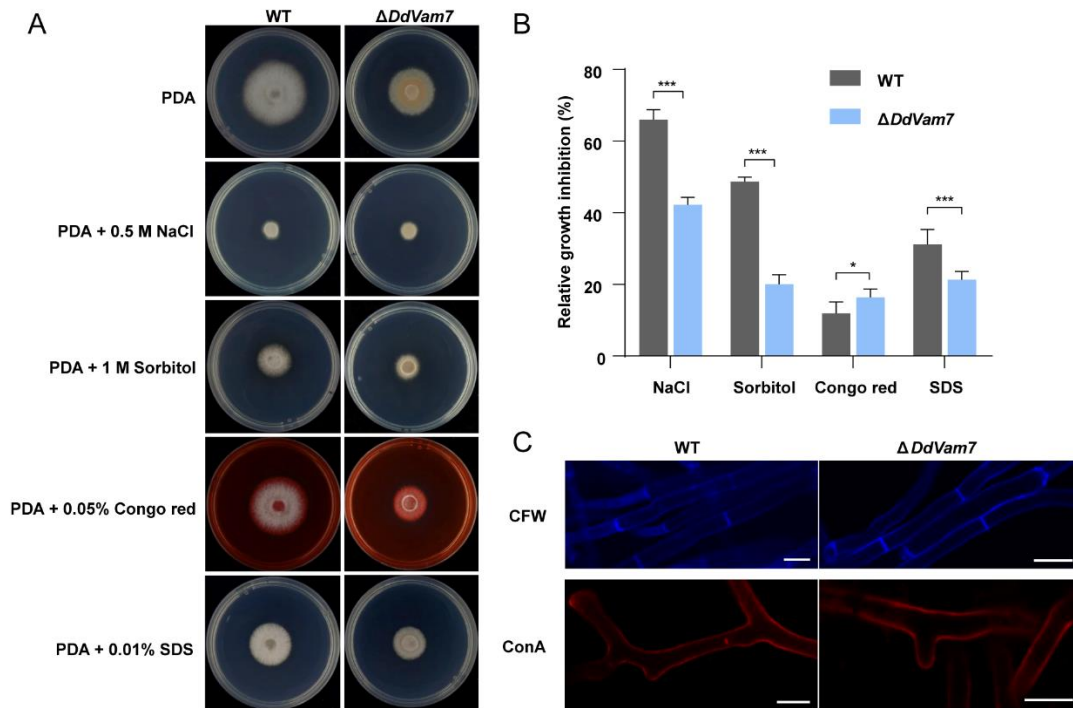

**Fig. S4** Role of DdVam7 in responding to abiotic stress. (A) Colony morphology of the wild type (WT) and  $\Delta DdVam7$  inoculated on PDA medium plates alone or supplemented with stressors. (B) Bar chart showing the relative growth inhibition by individual stressor. \*\*\* $P < 0.001$ , \* $P < 0.05$  ( $n = 6$ ). (C) Micrographs showing hyphae of the WT and  $\Delta DdVam7$  strains stained with CFW (for detecting chitin) and ConA (for staining  $\alpha$ -mannopyranosyl and  $\alpha$ -glucopyranosyl residues). The data shown here are representative results from the experiments performed in duplicate. Scale bar = 5  $\mu\text{m}$ .

**Fig. S5**

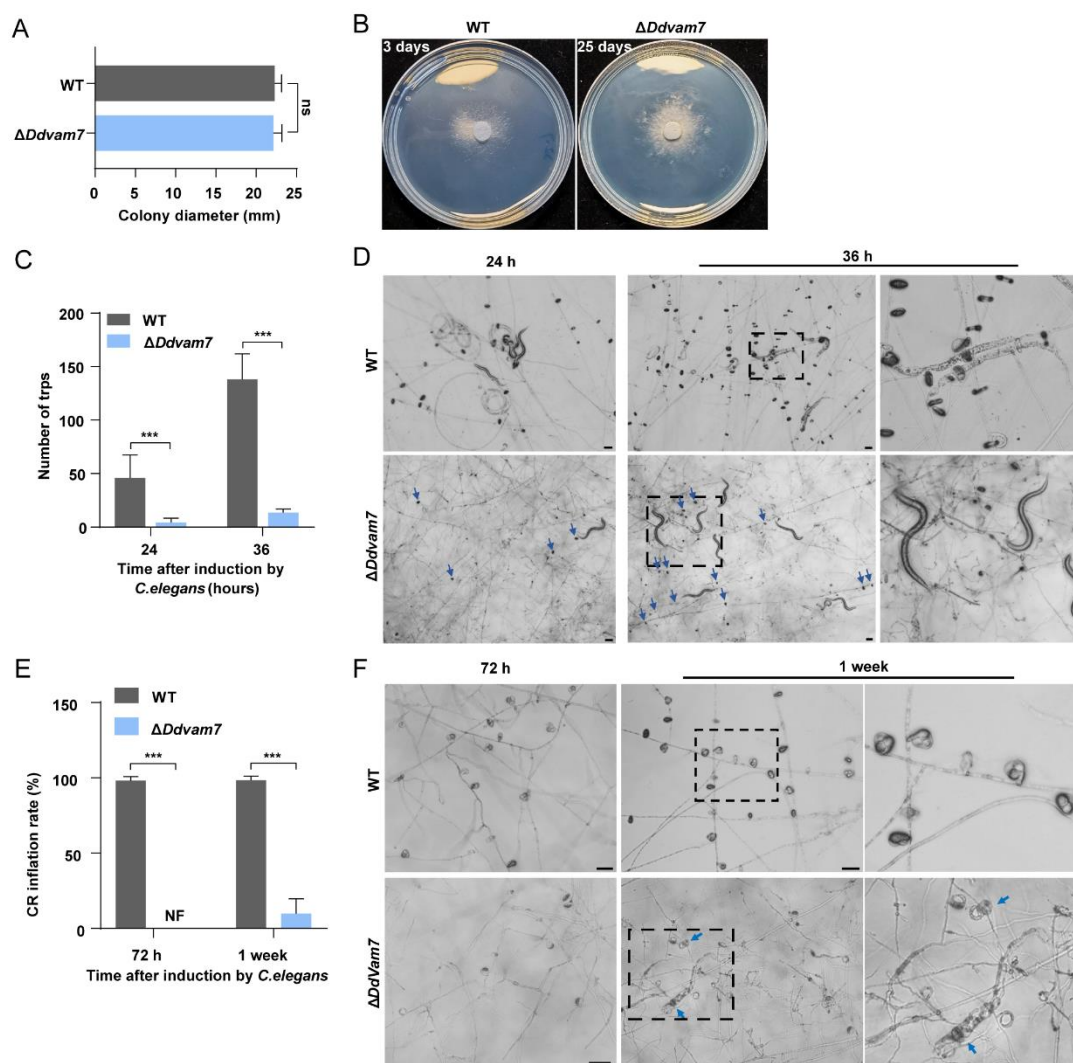

**Fig. S5** Phenotypic comparison between  $\Delta DdVam7$  and wild type under comparable growth. (A) Colony diameters of wild type (WT, 3-days-old culture) and  $\Delta DdVam7$  (25-day-old culture). ns = not significant (n = 5). (B) Colony morphology of WT and  $\Delta DdVam7$  cultured on WA plates for 3 days and 25 days respectively. (C) The numbers of CRs formed at 24 and 36 hours after introducing *C. elegans*. \*\*\*P < 0.001 (n = 6). (D) Light micrographs showing CR formation capacity. Blue arrows indicate the CRs. The right panel is close-up view indicated by dotted black box. Shown are representatives of at least five images. Scale bars = 50  $\mu$ m. (E) The percentages of inflated CRs at 72 hours and 1 week after introducing *C. elegans*. \*\*\*P < 0.001, NF = not found (n = 6). (F) Light micrographs showing ring cell inflation. Red arrows indicate inflated CRs. Scale bars = 50  $\mu$ m.

**Fig. S6**

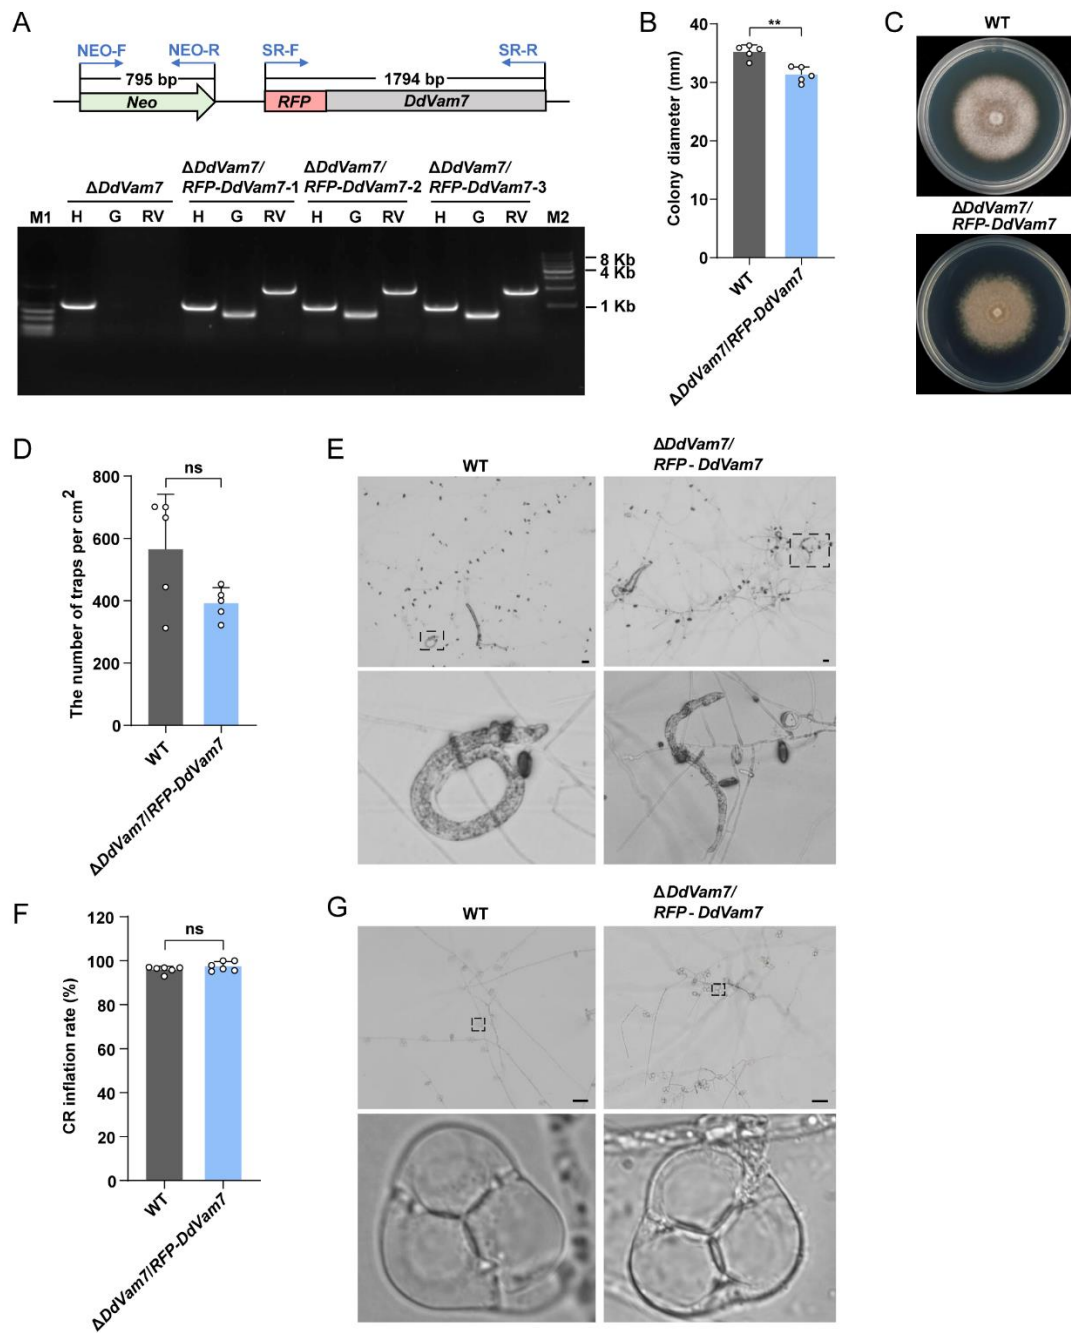

**Fig. S6** Phenotypic characteristics of the  $\Delta DdVam7/RFP-DdVam7$ . (A) Construction of  $\Delta DdVam7/RFP-DdVam7$  strains. M1: DNA marker D2000; M2: DNA marker 1 Kb; H: partial hygromycin resistance gene amplified using primers HYG-F and HYG-R; G: partial geneticin resistance gene amplified using primers NEO-F and NEO-R; RV: PCR results amplified using primers SR-F and SR-R. The regions amplified via PCR and the locations of individual primers were marked in upper panel. (B) Colony diameters of wild type (WT) and  $\Delta DdVam7/RFP-DdVam7$  cultured on PDA plates for 10 days. \*\* $P < 0.01$  ( $n = 5$ ) (C) Colony morphology of WT and  $\Delta DdVam7/RFP-DdVam7$  cultured on PDA plates for 10 days. (D) The numbers of CRs formed at 36 hours after introducing

*C. elegans*. ns = not significant (n = 5). (E) Light micrographs showing CR formation capacity at 36 hours after introducing *C. elegans*. The lower panel is close-up view indicated by dotted black box. Shown are representatives of at least five images. Scale bars = 50  $\mu$ m. (F) The percentages of inflated CRs at 72 hours after introducing *C. elegans*. ns = not significant (n = 6). (G) Light micrographs showing ring cell inflation. The lower panel is close-up view indicated by dotted black box. Scale bars = 50  $\mu$ m.

**Fig. S7**

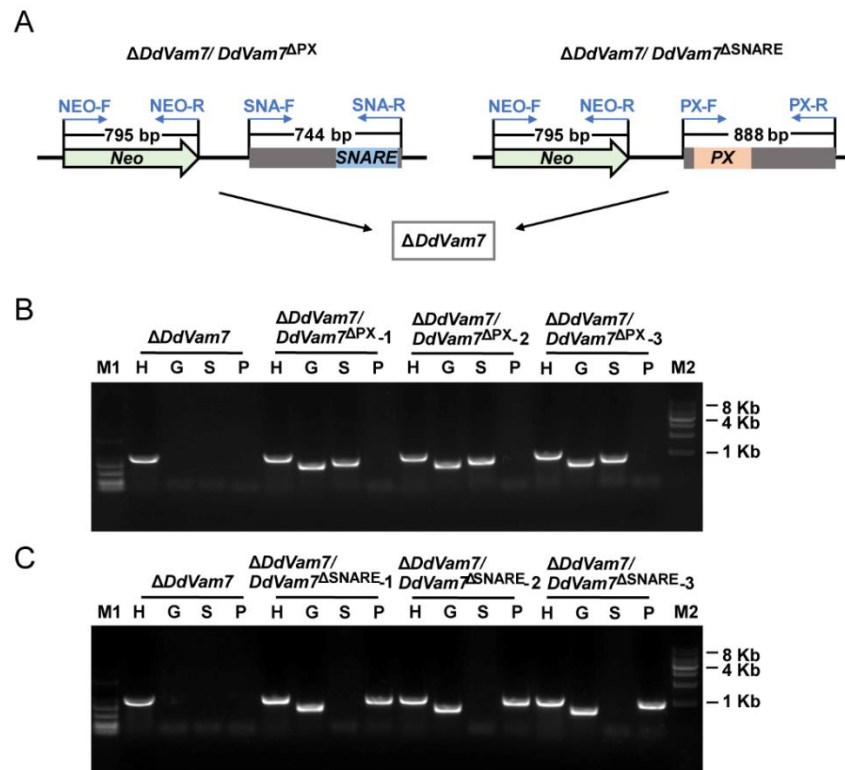

**Fig. S7** Domain deletion. (A) Schematic diagram of the domain deletion strategy. (B, C) Verification of domain disruption using PCR. M1: DNA marker D2000; M2: DNA marker 1 Kb; H: partial hygromycin resistance gene amplified using primers HYG-F and HYG-R; G: partial geneticin resistance gene amplified using primers NEO-F and NEO-R; S: PCR results amplified using primers SNA-F and SNA-R; P: PCR results amplified using primers PX-F and PX-R. The regions amplified via PCR and the locations of individual primers were marked in (A).



**Table S1.** List of putative SNARE proteins in *D. dactyloides*.

| <b>Locus name</b> | <b>Annotated function</b>                       | <b>Length<br/>(a.a)</b> | <b>SNARE<br/>domain<br/>position</b> |
|-------------------|-------------------------------------------------|-------------------------|--------------------------------------|
| 1295_g_dac        | Syntaxin/t-SNARE Sso1                           | 309                     | 208-271                              |
| 2995_g_dac        | Syntaxin/t-SNARE Sso1                           | 470                     | 371-433                              |
| 3420_g_dac        | Synaptobrevin/Vesicle-trafficking protein Sec22 | 215                     | 133-212                              |
| 3592_g_dac        | Synaptobrevin/VAMP-like protein/v-SNARE SNC1    | 237                     | 141-227                              |
| 3734_g_dac        | Qc-SNARE Vam7                                   | 361                     | 297-340                              |
| 4406_g_dac        | Golgi SNAP receptor complex member 2 (GOSR2)    | 329                     | 241-302                              |
| 5041_g_dac        | t-SNARE Syntaxin5 (Syn5)                        | 321                     | 266-317                              |
| 5412_g_dac        | v-SNARE VTI1 family protein                     | 226                     | 21-98                                |
| 5465_g_dac        | t-SNARE Syntaxin-2                              | 272                     | 199-239                              |
| 621_g_dac         | t-SNARE Syntaxin-16                             | 419                     | 236-296                              |
| 65_g_dac          | t-SNARE Syntaxin-8                              | 306                     | 219-286                              |
| 7439_g_dac        | SNARE Syntaxin-18                               | 352                     | 265-323                              |
| 7538_g_dac        | Synaptobrevin/VAMP-like protein/v-SNARE SNC1    | 119                     | 29-88                                |
| 8115_g_dac        | t-SNARE Syntaxin-6                              | 240                     | 147-208                              |
| 8656_g_dac        | Golgi SNAP receptor complex member 1 (GOSR1)    | 225                     | 141-202                              |
| 8744_g_dac        | Synaptobrevin/R-SNARE YKT6                      | 207                     | 145-205                              |

**Table S2.** List of the primers used in this study.

| Primers  | Sequence (5'-3')                                                                       | Description                                               |
|----------|----------------------------------------------------------------------------------------|-----------------------------------------------------------|
| Vam7-5F  | GTAACGCCAGGGTTTTCCAGTCACGATC                                                           | Amplify the 5' flanking region of the <i>DdVam7</i> gene  |
| Vam7-5R  | GGATAGCAGTCAGCAGTGGAT<br>CGAATTCAGTGGCCGTCGTTTTACAACGT<br>CCGAGTAGTAAGTCCTGGATGTC      |                                                           |
| Vam7-3F  | CGAAAATCATTCTACTAAGATGGGTATA                                                           | Amplify the 3' flanking region of the <i>DdVam7</i> gene  |
| Vam7-3R  | CGCATATACGCACGCGCAATTTTC<br>CGGAGCATTCACTAGGCAACCATGGTTAC<br>TATTGGTTGACGCACATGTCCCATG |                                                           |
| Vam7-CF  | AGATCTAGAGGATCCCCGACTAGTAGCC                                                           | Amplify the <i>DdVam7</i> coding region                   |
| Vam7-CR  | ACATCGAGAGGTCCTTGTTGTG<br>ATTTAAATCCGTTTAAACGGCGGCCATG<br>AAGTCGCCAGCGATTACTGTGC       |                                                           |
| Vam7-OF  | ACCGTCTACAACGTCAGCATCCGG                                                               | Amplify the <i>DdVam7</i> ORF                             |
| Vam7-OR  | AGTTCCTGCCCTATCTCAATGCC                                                                |                                                           |
| HYG-F    | AACTCACCGCGACGTCTGTCGAG                                                                | Amplify the hygromycin resistance gene                    |
| HYG-R    | ATCGGCGAGTACTTCTACACAGCCAT                                                             |                                                           |
| NEO-F    | GGCTATGACTGGGCACAACA                                                                   | Amplify the geneticin resistance gene                     |
| NEO-R    | GATACCGTAAAGCACGAGGAA                                                                  |                                                           |
| Vam7-UP  | AGTCGTCGCTGTAGCAGCCATATTGG                                                             | Verify the transformants (Amplify the 5F, 3F and L)       |
| Vam7-DN  | TCGCTGGCACCGATGTTTGGTAGTC                                                              |                                                           |
| Vam7-Q-F | ACCGTCTACAACGTCAGCATCCGG                                                               | For RT-PCR analysis of <i>DdVam7</i>                      |
| Vam7-Q-R | AGGAGCCACACCAGTCGACGATG                                                                |                                                           |
| SNA-F    | TCGTCTACATCCAATTACGACGCTTC                                                             | Amplify the <i>DdVam7</i> <sup>ΔPX</sup> coding region    |
| SNA-R    | TCAGCTGATTTTTTGTAGGCGTTTCTTGACC                                                        |                                                           |
| PX-F     | ATGAACGAGCCACAGCTCTTGA                                                                 | Amplify the <i>DdVam7</i> <sup>ΔSNARE</sup> coding region |
| PX-R     | TCACAGCTGTAAGACGCCCGAATTAT                                                             |                                                           |
| SR-F     | GAGCAAGGGCGAGGAGGATA                                                                   | Amplify the RFP- <i>DdVam7</i> coding region              |
| SR-R     | TATCGTCAACCCGTTCAACGTC                                                                 |                                                           |

## **Supplementary Movie Legends**

**Movie S1.** A nematode getting caught by a CR in wild type.

**Movie S2.** A nematode getting caught by a CR in *DdVam7<sup>C</sup>*.

**Movie S3.** A nematode entering and escaping from a CR of  $\Delta DdVam7$ .

**Movie S4.** Complete CR inflation in *D. dactyloides*, related to Figure 4D.

**Movie S5.** Uncomplete CR inflation in *D. dactyloides*, related to Figure 4E.
